# Supplementary material for: Morphological Variation and Inter-Relationships of Quantitative Traits in Enset (Ensete ventricosum (welw.) Cheesman) Germplasm from South and South-Western Ethiopia
Source: MDPI journal article supplement (doi:10.3390/plants6040056), 2017-12-06
Supplement: s1 [file s1]

# **Title: Morphological variation and inter-relationships of quantitative traits in enset (*Ensete ventricosum* (Welw.) Cheesman) germplasm from south and south-western Ethiopia**

**Authors:** Zerihun Yemataw \*, Alemayehu Chala, Daniel Ambachew, David Studholme, Murray Grant and Kassahun Tesfaye \*

**Declaration:** MG acknowledges receipt of funding from the BBSRC Global Challenge Research Fund Impact Acceleration Account Award (BB/GCRF-IAA/22).
