# Supplementary material for: Morphological Variation and Inter-Relationships of Quantitative Traits in Enset (Ensete ventricosum (welw.) Cheesman) Germplasm from South and South-Western Ethiopia
Source: Plants (Basel). 2017 Dec 6;6(4):56. doi: 10.3390/plants6040056 (PMC5750632; doi:10.3390/plants6040056)
Supplement: Supplementary file 1 [file plants-06-00056-s001.xls]

## Sheet: Sheet1
Means of 15 Quantitative traits of the 387 Enset clones tested at Areka
	ENTRYNO	CollLoc	CollALT	MT	PLHT	PSHT	PSCIR	LFNO	LFHT	LFWTH	LFSTHNO	LFSTHBD	LFSTHAD	CSBG	CORMBG	FYIELD	UNSQKOCH	SQKOCHO
	1	1	3	4.8	6.71	2.19	1.3625	9.5	4.3625	0.6925	16.5	70.4625	32.9625	13.9625	36.4625	37.5125	12.05	8.25
	2	1	2	2.85	6.35	1.85	1.2625	10	3.69	0.64	19	60.4625	29.9625	19.2125	18.2125	49.67	14.0125	10.3425
	3	1	2	4.075	4.8125	1.5125	0.9125	12.5	3.1	0.5425	17.5	38.9625	19.9625	9.7125	19.4625	25.6725	12.69	8.5125
	4	1	3	4.7625	5.71	1.7625	1.38	12	3.6625	0.68	20.5	96.9625	46.4625	16.9625	62.9625	58.96	21.635	17.565
	5	1	2	5.925	4.21	1.3625	1.1625	7.5	2.44	0.5125	25	26.4625	12.4625	10.4625	30.4625	18.2	5.075	3.2025
	6	1	3	2.07	4.3625	1.1125	0.81	13.5	2.98	0.6125	21	49.9625	25.4625	11.4625	4.9625	41.7	16.355	8.925
	7	1	3	3.2525	5.1725	1.49	1.2125	10	3.2625	0.64	14.5	38.9625	22.9625	12.9625	15.4625	34.495	10.11	5.4425
	8	1	2	5.975	4.17	1.2125	1.04	5	2.04	0.5625	16	40.4625	16.9625	9.4625	30.9625	18.9725	5.1725	4.5125
	9	1	2	3.9525	5.4725	1.6625	1.16	11.5	3.2525	0.5425	19	53.4625	30.4625	13.4625	37.4625	43.8325	19.105	11.945
	10	1	3	2.9825	5.4425	1.4625	1.2625	14.5	3.64	0.6225	21.5	71.4625	36.9625	17.4625	28.9625	58.8925	15.1425	6.725
	11	1	2	4.895	5.1625	1.69	1.0925	8	3.18	0.6225	16	42.4625	17.4625	10.9625	23.9625	23.2425	8.9025	6.06
	12	1	2	3.265	6.9125	2.1125	1.2825	12.5	4.2125	0.85	21.5	97.4625	52.9625	26.9625	37.7125	76.1725	34.2525	23.165
	13	1	3	4.855	7.5125	2.39	1.27	9	4.6725	0.69	23	106.963	42.9625	14.4625	46.4625	45.9725	17.66	14.12
	14	1	2	2.2425	4.78	1.34	1.0725	9	3.1625	0.68	22	72.4625	18.7125	13.9625	11.9625	41.2425	13.34	10.1125
	15	1	3	3.305	7.1625	2.3125	1.5525	10	4.2225	0.8025	21.5	108.463	56.4625	26.4625	42.9625	80.9525	21.065	11.7725
	16	1	3	3.805	5.99	1.99	1.0125	10.25	3.2625	0.5625	17.5	65.4625	23.9625	13.7125	34.7125	40.76	17.29	11.6225
	17	1	3	4.32	6.1125	1.7125	1.08	10	3.59	0.57	16.5	46.4625	24.9625	10.9625	38.4625	36.7925	8.2425	4.9225
	18	1	2	2.8025	7.42	2.0625	1.54	11	4.42	0.7925	18.5	89	60.9625	22.4625	44.4625	95.4725	40.2525	20.5
	19	1	3	2.535	5.2125	1.4625	1.1625	10.5	3.29	0.67	16	61.4625	31.9625	19.2125	14.9625	54.43	22.5725	14.7625
	20	1	3	3.2225	5.1725	1.39	1.1525	10	3.2125	0.62	17.5	54.4625	26.7125	12.7125	22.4625	40.5725	15.2825	10.2925
	21	1	3	5.2325	4.79	1.5125	1.0125	8.5	3.2425	0.68	18.5	40.4625	23.4625	23.4625	14.9625	25.275	6.95	4.68
	22	1	3	6	4.71	1.5125	1.2625	6.5	3.0625	0.6625	16.5	76.9625	34.4625	10.9625	27.4625	23.8625	9.13	8.3125
	23	1	2	4.79	6.0825	1.7625	1.3525	11	3.84	0.81	22	90.4625	24.9625	21.9625	28.4625	34.47	14.0225	9.1925
	24	1	3	5.5825	5.8025	2.1025	1.0925	10.5	3.75	0.56	20	64.4625	25.9625	6.4625	26.9625	22.9925	10.5625	8.8225
	25	1	2	3.99	4.79	1.4125	1.09	10	2.9	0.5625	17.5	57.9625	21.4625	11.9625	23.4625	30.4325	15.3	8.56
	26	1	3	2.9325	5.34	1.6125	1.0125	8.5	3.2125	0.61	21	52.4625	25.4625	11.4625	18.9625	40.1925	16.1425	11.46
	27	1	3	3.21	5.6225	1.5225	1.47	13.75	3.5825	0.8125	21.5	81.4625	41.9625	24.4625	30.7125	63.985	19.71	9.9225
	28	1	2	3.1525	5.9425	1.69	1.2125	10	3.69	0.6725	18	85.9625	43.9625	16.9625	17.9625	52.385	21.8525	14.35
	29	1	3	4.24	5.3625	1.59	1.0125	10	3.51	0.72	20	51.4625	37.9625	10.4625	32.4625	41.6025	11.525	5.47
	30	1	3	4.8025	5.65	2.04	0.9625	7.5	3.27	0.7125	15	60.4625	25.4625	14.4625	28.4625	30.765	10.0525	6.91
	31	1	1	2.81	6.59	1.9625	1.2125	11.5	3.9625	0.67	18.5	76.4625	35.9625	17.9625	23.9625	58.615	16.115	9.21
	32	1	3	5.8625	5.38	2.19	1.1625	5	3.1525	0.64	19	71.9625	29.9625	11.9625	33.4625	23.9225	8.7725	7.0425
	33	1	2	2.44	5.54	1.2125	0.9625	14	3.7225	0.6525	21.5	47.4625	22.4625	8.4625	11.4625	36.18	16.165	11.0325
	34	1	3	3.805	5.99	1.99	1.0125	10.5	3.2625	0.5625	13.5	43.4625	17.9625	14.2125	21.2125	29.925	14.57	7.69
	35	1	3	3.0625	5.69	1.6625	1.1025	11	3.5625	0.6525	18.5	57.9625	30.4625	17.9625	13.9625	44.83	14.8725	8.52
	36	1	3	2.8325	5.3125	1.5125	0.94	11.5	3.3125	0.62	18.5	45.9625	22.9625	11.4625	10.4625	33.335	9.6525	4.9225
	37	1	2	3.735	7.1125	2.0125	1.0625	10	4.2625	0.7225	20.5	95.9625	46.4625	17.9625	44.4625	62.3225	26.0125	16.405
	38	1	2	3.7525	5.6725	1.54	1.04	9	3.3525	0.5725	20.5	49.4625	27.4625	9.4625	26.9625	36.3325	14.16	8.7525
	39	1	3	4.28	5.4525	1.79	1.2525	11.5	3.1025	0.5225	20	70.9625	40.4625	16.4625	43.9625	49.645	14.8525	9.7025
	40	1	2	5.0025	4.6625	1.4625	0.9625	7.5	2.9425	0.54	19.5	36.4625	20.4625	8.9625	23.4625	23.0225	8.3925	5.5725
	41	1	3	2.545	6.08	1.6625	1.42	13.5	3.7525	0.7425	22.5	85.4625	38.4625	17.9625	19.9625	62.6525	29.065	22.5125
	42	1	2	3.62	5.0125	1.4625	0.99	7.5	3.1625	0.5625	17	62.4625	26.4625	12.9625	14.9625	31.93	16.6825	7.88
	43	1	3	4.74	6.55	2.0125	1.125	10.5	4.16	0.64	24	103.463	51.9625	13.2125	47.9625	50.965	19.265	13.7325
	44	1	2	2.24	4.2425	1.39	0.97	12	2.74	0.52	24.5	63.4625	28.4625	15.4625	5.4625	45.9825	23.2125	16.2625
	45	1	3	4.0425	5.3125	1.64	1.19	12	3.42	0.6325	26.5	93.4625	41.4625	14.4625	34.4625	48.035	17.855	12.2325
	46	1	2	4.1125	5.35	1.6125	1.09	11.5	3.7225	0.6525	15.5	32.9625	16.4625	9.4625	11.9625	19.77	7.99	5.17
	47	1	3	4.6125	6.06	2.4225	1.1025	10	3.2725	0.7	20.5	53.4625	26.2125	15.4625	50.4625	43.0725	14.9425	7.84
	48	1	3	2.505	6.4	2.0625	1.3125	11.5	4.38	0.87	23	105.963	63.9625	25.9625	20.4625	93.7025	31.8525	7.5825
	49	1	3	3.75	6.4325	1.9625	1.0725	14	3.59	0.66	19.5	50.2125	24.4625	20.9625	28.9625	43.185	21.45	14.87
	50	1	2	5.31	7.6125	2.5625	1.4225	10	4.6625	0.7425	22.5	130.463	50.4625	19.4625	69.4625	56.6525	19.995	16.5
	51	1	2	4.1625	5.2025	1.6625	1.14	12.5	3.3625	0.7525	16	61.4625	31.9625	18.4625	14.9625	33.62	14.1225	9.2325
	52	1	3	3.0625	5.5225	2.1625	1.04	10	3.5525	0.62	19	75.4625	28.4625	15.9625	20.2125	44.275	9.76	4.8825
	53	1	3	3.8025	6.7125	1.9125	1.09	10.5	3.2625	0.54	18	54.4625	26.9625	10.9625	28.9625	37.4925	16.5125	10.75
	54	1	3	5.85	4.8625	1.24	1.4625	6	3.28	0.64	17	75.4625	33.9625	9.4625	45.4625	28.4525	9.315	7.975
	55	1	3	4.0125	5.85	1.9125	1.2725	12.5	3.4	0.74	22.5	64.4625	28.9625	15.9625	37.4625	43.71	16.5725	11.3925
	56	1	3	3.225	5.28	1.5	1.12	12	3.38	0.66	20	65.9625	24.7125	13.4625	15.4625	35.21	11.6225	7.1925
	57	1	3	4.58	6.19	1.93	1.42	11.9625	3.9125	0.7125	20	74.4625	38.9625	20.9625	39.9625	46.855	13.305	9.56
	58	1	3	4.265	5.79	1.7125	1.3	11.75	3.32	0.7125	24	88.4625	40.2125	16.4625	38.7125	47.9725	17.425	13.13
	59	1	2	3.81	5.9725	1.94	1.14	12	3.55	0.5425	22	73.4625	32.4625	12.4625	27.4625	40.86	16.4325	10.7525
	60	1	3	5.8375	4.3325	1.0825	1.1025	7	2.7625	0.4225	17	45.9625	15.9625	8.9625	13.9625	11.9825	5.8225	3.6625
	61	1	3	5.3225	6.2	1.79	1.1625	9	4.2125	0.6825	17.5	30.4625	12.9625	12.4625	22.4625	19.38	10.48	8.255
	62	1	1	4.795	7.51	2.8625	1.02	12	4.3425	0.65	21.5	105.963	48.4625	12.9625	47.9625	48.9725	19.205	13.6125
	63	1	3	4.17	6.1625	1.94	1.29	11	3.94	0.71	18.5	82.4625	36.2125	15.4625	34.4625	44.8425	13.52	10.1125
	64	1	2	4.0125	3.9225	1.29	0.75	10.5	2.24	0.4625	15	20.4625	11.9625	8.4625	10.7125	16.575	6.07	4.475
	65	1	3	5.2	5.9425	1.84	1.1125	10	3.7825	0.69	21.5	46.4625	19.4625	9.9625	22.4625	21.435	9.8925	6.375
	66	1	3	4.08	5.5025	1.6625	1.09	9	3.1125	0.66	20	61.4625	27.9625	11.4625	29.4625	36.2725	16.525	10.9825
	67	1	3	3.9	6.44	1.5625	1.2025	10	3.7425	0.7425	17.5	74.2125	39.3625	17.9625	32.4625	49.2625	19.61	11.85
	68	1	3	3.1625	6.1225	1.79	1.2725	12	3.89	0.6225	18	67.9625	40.4625	15.9625	20.9625	52.015	22.295	13.2025
	69	1	3	4.5125	4.5125	1.6625	1.0625	12	2.5825	0.5725	15.5	28.2125	14.9625	10.4625	27.9625	25.4025	9.6	7.19
	70	1	3	5.405	5.0725	1.71	1.08	9	3.04	0.62	18.5	38.4625	17.9625	12.1125	33.9625	25.6125	9.5825	7.7725
	71	1	2	3.125	6.06	1.84	1.2	11	3.9	0.7325	19.5	62.9625	28.9625	14.9625	21.4625	43.9725	18.4025	11.355
	72	1	2	3.425	5.4025	1.54	1.1625	11.5	3.34	0.68	17	65.4625	30.2125	18.4625	21.7125	43.65	17.22	8.3725
	73	1	2	4.8025	5.1825	1.6125	1.22	9.5	3.39	0.5625	17.5	39.9625	15.4625	13.4625	25.4625	24.4725	12.6525	7.7625
	74	1	2	2.58167	6.98167	2.26833	1.51833	9.83333	4.4425	0.925	19.1667	150.129	72.2125	29.1217	40.1292	94.1433	28.5875	19.7683
	75	1	2	4.6775	6.64583	2.13833	1.22833	9.25	4.28083	0.679167	22.5	112.713	53.7958	23.2125	50.3792	51.7425	27.825	18.83
	76	1	2	3.465	5.82167	1.72917	1.1475	10.8333	3.08917	0.505833	21	86.5458	49.2625	20.3792	31.2125	46.2458	24.6275	16.7592
	77	1	2	3.07	7.07917	2.5125	1.345	11.5	3.86417	0.6775	20.1667	121.879	62.6292	23.3792	35.0458	72.0992	27.3967	18.4342
	78	1	2	3.94583	6.08833	1.97167	1.2725	9.41667	3.35	0.6075	26.5	200.629	84.8792	24.6292	55.2958	73.805	26.4358	19.7158
	79	1	2	3.59583	4.45667	1.5875	0.870833	8.83333	2.38917	0.445833	17	70.4625	42.1458	19.6292	26.6292	67.4692	20.895	13.0608
	80	2	2	4.845	6.03	1.94	1.16	8.5	3.8125	0.8	16.5	61.9625	27.4625	10.4625	17.9625	24.9125	8.6725	6.2325
	81	2	2	5.4225	4	1.5225	0.61	8.5	2.21	0.53	11	9.9625	5.9625	6.4625	13.9625	10.4	2.5625	1.37
	82	2	2	4.8725	4.7625	1.4625	0.8625	9	2.76	0.54	12.5	26.4625	12.4625	7.9625	42.4625	27.7425	12.7525	8.12
	83	2	3	5.73	6.1625	1.99	1.37	11	3.9125	0.73	18.5	82.4625	40.4625	13.9625	62.9625	44.2925	14.9325	12.485
	84	2	3	4.735	5.6125	1.8125	1.5625	9	3.69	0.8125	19.5	78.4625	43.4625	15.4625	53.4625	50.94	21.7125	17.6325
	85	2	3	5.9025	5.85	1.9125	1.43	10.5	3.5325	0.84	16.5	89.9625	43.9625	15.9625	58.4625	41.45	7.9125	6.6425
	86	2	3	4.7325	4.7625	1.6025	1.1025	7.5	2.34	0.6625	12.5	37.9625	24.9625	15.4625	43.4625	38.04	7.6725	5.1725
	87	2	3	3.8125	5.3625	2.29	1.05	13	3.7625	0.6	22	61.7125	25.9625	16.7125	22.4625	36.8525	17.3125	14.175
	88	2	3	5.7725	3.6625	1.3625	0.84	8	2.0625	0.4625	15	22.9625	14.4625	5.9625	18.9625	14.7425	3.335	2.3925
	89	2	3	4.2025	6.59	1.8625	1.3325	11	3.7025	0.8025	19	86.9625	39.9625	25.4625	45.9625	56.6125	26.9825	20.12
	90	2	3	4.035	6.31	1.79	0.93	7	3.19	0.6125	14.5	29.9625	14.4625	9.4625	14.4625	20.345	5.26	3.1425
	91	2	3	3.6725	5.09	1.44	1.09	12	3.0725	0.5425	21	49.9625	24.9625	15.9625	23.2125	37.14	15.8725	11.1025
	92	2	2	3.8225	4.7625	1.4625	0.8625	9.5	2.76	0.54	15	38.4625	15.4625	11.4625	16.9625	24.595	7.7	4.1125
	93	2	2	5.7425	4.67	1.59	1.14	9	2.83	0.5725	17	37.9625	17.9625	14.9625	27.9625	23.4425	10.565	7.835
	94	2	2	5.9125	2.9625	0.9625	0.68	4.9625	1.9425	0.3725	14	10.9625	2.9625	1.9625	16.9625	7.06	1.88	1.26
	95	2	3	4.6925	7.32	2.4125	1.64	11	4.3325	0.85	20.5	124.963	60.9625	18.4625	55.4625	62.9125	24.415	17.625
	96	2	3	4.805	5.7925	1.7625	1.2525	10.5	3.6	0.85	17.5	50.4625	24.4625	16.4625	46.4625	39.605	16.595	11.03
	97	2	2	4.9525	4.5525	1.44	0.9525	9.5	2.7025	0.61	15	31.9625	13.9625	6.9625	16.4625	16.2325	5.6	3.22
	98	2	2	5.8125	3.2525	1.2125	0.9625	6.5	2.4725	0.6625	15.5	67.9625	32.4625	21.9625	25.4625	23.115	7.47	5.02
	99	2	2	3.025	6.23	1.3625	1.2225	8	3.7125	0.7	16	67.9625	32.4625	21.9625	25.4625	55.705	15.3025	13.7325
	100	2	3	3.24	5.09	2.19	1.1125	10.5	3.0725	0.5825	14.5	45.9625	20.4625	17.4625	15.4625	34.85	12.6825	6.8125
	101	2	3	4.6025	4.3225	1.4125	0.9625	8	2.3725	0.5925	19	27.4625	14.4625	9.4625	22.9625	21.955	10.205	6.5325
	102	2	3	4.11	2.29	0.9625	0.54	6.5	1.05	0.33	14.5	9.9625	4.4625	2.4625	6.4625	7.0625	2.4625	1.41
	103	2	3	5.875	4.68	1.64	0.9	8.5	2.7325	0.5625	14	27.4625	19.4625	9.4625	30.4625	21.8425	5.1025	2.9025
	104	2	2	2.76	5.6	1.29	1.18	12.5	3.6025	0.73	18.5	50.4625	25.4625	17.4625	14.4625	43.795	16.7225	13.6825
	105	2	3	5.2225	4.9425	1.64	0.9725	8	3.1	0.6725	16.5	44.9625	18.9625	11.4625	16.9625	19.57	7.015	3.59
	106	2	3	2.6925	5.9125	1.54	1.275	11.25	3.88	0.685	23.5	64.9625	12.84	16.4625	22.9625	47.675	15.1325	10.725
	107	2	3	2.64	5.1625	1.545	1.4725	11.75	3.1725	0.705	32.5	94.9625	41.88	18.795	18.2125	60.065	15.75	11.3725
	108	2	3	2.9025	5.4325	1.64	1.2825	11	3.2925	0.7025	24	87.13	35.9625	15.4625	17.4625	69.5725	22.125	16.6825
	109	2	3	4.9125	5.5425	1.74	1.325	11.25	3.425	0.775	28.5	70.09	32.2125	17.7125	17.4625	41.84	11.5125	8.2325
	110	2	3	3.1725	5.0225	1.425	1.25	11.25	3.1925	0.6525	29	73.88	33.7125	17.09	15.4625	37.7725	16.4225	12.4825
	111	2	3	2.925	4.9425	1.4125	1.3425	11	3.4225	0.695	29	83.88	38.4625	16.295	19.63	60.97	18.1825	13.3725
	112	2	3	2.8825	2.9625	2.1125	1.235	9.75	3.205	0.7425	30	69.4625	29.4225	20.84	13.2125	24.875	20.04	15.865
	113	2	3	3.1625	4.9125	1.3625	1.095	8	3.3	0.655	18.25	47.7125	26.4625	14.84	29.7125	41.92	11.3425	6.745
	114	2	2	4.7825	5.19	1.7025	1.2025	9.25	4.0825	0.615	20	67.7125	27.7125	23.7125	17.2125	22.1425	7.86	5.15
	115	2	2	5.22	6.8325	1.8625	1.31	11	3.895	0.9125	19.75	117.463	47.2925	27.2925	26.795	22.6525	9.6125	7.2725
	116	2	2	3.555	5.8625	1.5325	1.605	12	3.7025	0.715	18	55.2125	26.7125	20.2125	30.7125	35.1025	10.8725	7.815
	117	2	2	4.7525	6.0125	1.865	1.2925	11.5	3.94	0.7425	19.75	76.88	23.295	15.9625	16.84	11.8325	5.25	3.745
	118	2	3	3.085	5.815	2.0525	1.045	10.25	2.875	0.745	20	74.7125	35.9625	20.09	30.4625	17.585	18.955	14.375
	119	2	3	4.745	6.3525	1.69	1.38	12	3.2925	0.64	27	53.4625	18.7125	15.7125	15.7125	16.5425	9.9525	6.6225
	120	2	3	2.5	5.3825	1.67	1.2025	10.25	3.1625	0.6525	37	65.4625	21.4625	16.59	20.84	58.0425	18.9925	13.1925
	121	2	3	3.2	5.8325	3.6125	1.13	11.5	3.3125	0.6825	16.25	44.13	30.6125	19.795	19.63	50.6625	8.93	5.6025
	122	2	3	4.3825	5.495	1.64	1.22	10.75	3.4525	0.69	19	69.9625	42.7125	15.045	24.4625	41.5625	10.02	18.5425
	123	2	3	5.73	5.3025	1.2125	1.4625	10	4.26	0.68	28.25	45.4625	24.5125	11.7125	18.59	26.89	7.07	3.3525
	124	2	2	6.005	6.53	1.95	1.58	14.5	3.7525	0.77	24	101.63	60.2125	25.13	42.295	54.145	16.5825	11.45
	125	2	2	6.02	6.2925	1.94	1.5225	11.5	4.6225	0.755	25	109.63	74.3125	17.545	37.1325	53.1625	15.745	9.9925
	126	2	2	4.355	7.345	1.3575	1.655	12.25	3.2825	0.86	27	137.295	84.24	32.38	43.7125	50.0725	16.03	14.005
	127	2	3	5.8725	5.46	1.63	1.135	8	3.585	0.665	21	53.2925	34.3125	16.295	20.0425	44.8325	7.6625	4.775
	128	2	3	5.8	5.93	1.8825	1.3125	12	4.12	0.675	20.5	99.575	46.8125	24.325	27.4625	45.0925	14.4725	9.98
	129	2	3	5.9775	5.1725	1.645	1.2025	10	3.34	0.8	22.5	86.13	48.2625	14.63	26.13	48.3625	15.57	10.7625
	130	2	3	5.505	5.625	1.58	1.22	10	3.1625	0.635	23	59.795	37.7625	15.545	18.2925	46.6625	11.665	8.545
	131	2	3	5.9775	4.9225	1.575	1.25	8	2.8025	0.7325	20.5	74.7125	32.6625	9.9625	24.9625	22.5625	4.3825	2.3825
	132	2	3	4.99	7.0125	1.89	1.3025	11	1.81	0.69	22.25	92.84	42.59	29.2125	42.59	17.545	13.6725	10.2225
	133	2	4	5.0925	4.6775	1.59	1.1	10.25	3.53	0.5125	17	68.4625	38.88	26.4625	28.5425	40.995	14.735	12.2925
	134	3	2	5.085	5.4325	1.6625	1.06	8.25	4.0125	0.64	17	48.9625	22.9625	13.9625	38.9625	32.5825	17.8925	13.6725
	135	3	2	3.8725	6.14	1.74	1.24	10.5	2.84	0.6925	16.5	45.9625	24.4625	11.2125	11.2125	25.8125	14.8425	11.2625
	136	3	2	5.9475	4.8925	1.6725	1.0425	6.5	3.46	0.5725	12.5	32.4625	21.4625	9.9625	31.4625	21.645	6.6025	5.115
	137	3	3	5.18	5.6625	1.84	0.98	10	3.5	0.7525	20	52.4625	18.9625	9.4625	22.9625	21.405	8.1825	5.605
	138	3	2	4.25	6.5725	1.84	1.1025	11.5	4.4	0.7325	16.5	50.4625	22.7125	19.7125	18.7125	30.745	14.3625	10.315
	139	3	2	5.1325	7.1325	2.3625	1.9125	10	3.53	0.86	21.5	120.963	66.9625	60.4625	72.4625	83.5225	30.6525	21.2725
	140	3	1	5.575	5.59	1.79	1.3525	10.5	2.7625	0.7025	20.5	69.9625	33.9625	15.4625	50.9625	38.74	17.015	13.88
	141	3	1	5	4.8125	1.8125	1.04	10	3.4625	0.64	15	26.4625	14.4625	11.9625	42.4625	29.65	14.15	9.21
	142	3	2	5.9125	5.2025	1.59	1.12	7	3.29	0.61	16	37.4625	19.9625	13.9625	48.9625	27.0425	8.9625	6.905
	143	3	3	2.8725	5.2125	1.4625	1.0325	10	3.2125	0.7025	19	56.9625	31.2125	12.2125	15.2125	43.58	19.21	12.205
	144	3	2	3.8425	4.9025	1.6	0.95	11	2.8525	0.66	14	34.4625	15.4625	10.2125	16.9625	23.695	7.4425	5.7825
	145	3	3	2.295	4.5125	1.5625	0.8025	9.5	2.7025	0.5825	17	41.9625	24.2125	12.4625	10.7125	42.775	13.0325	8.0825
	146	3	2	4.7825	4.39	1.42	1.0625	11	3.3125	0.67	17.5	40.4625	18.9625	11.9625	24.4625	25.7625	10.9425	7.575
	147	3	1	3.3	5.29	1.7125	1.09	10	2.9625	0.69	19.5	67.9625	32.9625	14.4625	20.4625	43.4025	10.305	6.2525
	148	3	4	3.2525	4.8125	1.4625	1.4625	6	4.3325	0.6125	12	35.9625	18.9625	16.4625	33.4625	44.775	19.4325	12.3
	149	3	4	5.8275	6.5025	2.84	2.0025	9.5	3.29	0.68	21	95.9625	35.9625	14.4625	50.9625	34.6425	10.8625	7.605
	150	3	3	5.285	5.27	1.6625	1.56	10.5	3.7825	0.7125	18	49.9625	17.4625	15.4625	38.4625	29.105	10.5525	7.0925
	151	3	3	5.03	5.8125	1.8	1.3025	8.5	2.54	0.6025	17.5	60.4625	34.4625	15.4625	47.4625	41.6825	16.375	12.3325
	152	3	3	4.0925	4.3125	1.4125	0.99	11	3.75	0.66	17	42.9625	16.2125	9.9625	19.9625	23.3425	8.7225	6.1025
	153	3	3	5.0025	5.9225	1.88	1.24	11	3.35	0.7725	17.5	57.9625	33.9625	17.4625	15.9625	29.73	12.625	9.2425
	154	3	2	3.4725	5.6125	1.8125	1.1625	11.5	3.2725	0.7	22	71.9625	37.4625	14.4625	22.9625	46.4425	20.7	15.275
	155	3	1	4.18	5.4625	1.6625	1.1125	11	3.2	0.5725	15	34.4625	18.4625	10.4625	25.9625	28.295	10.4625	7.3325
	156	3	2	3.1125	6.19	2.6625	0.9625	11.5	4.13	0.6525	15	47.4625	23.9625	15.9625	18.4625	39.6	17.22	10.78
	157	3	3	3.3325	6.3625	2.09	1.01	12.5	3.44	0.7625	20.5	64.9625	26.9625	14.7125	20.4625	39.485	20.285	9.805
	158	3	2	4	6.2625	1.9125	1.3125	10.5	3.34	0.8	19.5	90.4625	43.9625	16.4625	40.2125	54.0425	17.945	12.405
	159	3	3	5.755	5.3625	1.7425	1.1525	10.5	3.65	0.6825	20.5	46.9625	22.4625	10.4625	30.4625	23.82	10.29	6.7225
	160	3	3	4.9925	6.0625	1.5125	1.1625	11.5	2.74	0.7125	21	45.4625	22.4625	15.4625	30.4625	29.8425	10.6225	7.3925
	161	3	4	4.71	4.5825	1.54	1.19	9.5	2.7125	0.5825	13.5	24.4625	14.9625	6.4625	22.4625	20.8625	8.0725	4.4025
	162	3	4	3.725	4.7425	1.44	0.9125	8.5	4.24	0.5225	15.5	30.9625	16.4625	10.2125	18.4625	25.385	15.135	8.39
	163	3	3	4.8725	7.0125	2.49	1.1225	7.5	2.4225	0.75	16.5	82.9625	32.9625	15.9625	45.9625	41.855	14.2925	9.8825
	164	3	3	5.855	4.5	1.7525	1.33	9	3.25	0.5125	16	24.4625	11.9625	5.9625	25.9625	15.14	3.275	1.72
	165	3	3	5.62	5.78	1.8125	1.05	9.5	2.78	0.6525	15	36.4625	22.4625	15.4625	28.9625	25.72	9.0825	6.59
	166	3	3	5.665	4.6225	1.49	0.9125	9	2.39	0.6425	15	31.4625	13.9625	8.4625	22.4625	17.1025	7.7725	5.6825
	167	3	3	5.32	4.44	1.6925	0.7825	8	4.025	0.57	14	13.7125	7.4625	8.4625	9.9625	10.4925	4.6225	2.9
	168	3	1	4.45	7.1525	2.175	1.5525	11	3.3825	0.665	18	36.9625	16.34	16.34	30.84	37.2725	11.81	8.415
	169	3	1	5.015	4.44	1.2125	1.06	9	2.7125	0.6125	17.25	26.9625	13.9625	9.7125	14.7125	43.8825	6.0725	4.6125
	170	3	3	5.8175	4.9525	1.1025	1.9825	12.5	2.6525	0.5625	23	99.7125	35.9625	23.4625	39.9625	33.525	13.2425	6.6025
	171	3	2	3.1525	6.825	2.29	1.5425	10.25	3.445	0.6025	17.75	127.213	53.9625	25.34	34.9625	44.8025	23.17	17.435
	172	3	3	3.7	4.295	0.9725	0.98	10	3.695	0.5825	20.25	37.34	11.84	17.9625	8.2125	49.075	4.725	3.31
	173	3	3	4.285	4.715	1.4525	1.3625	9	3.92	0.735	19	31.1125	11.59	12.2125	13.59	50.3825	7.495	5.81
	174	3	2	5.0125	2.8925	1.1425	1.1625	12.25	3.3425	0.685	22.25	25.4625	10.7125	11.4625	9.7125	61.915	5.1525	2.685
	175	3	2	5.24	4.0525	1.3525	0.835	11	2.8125	0.7225	19	44.9625	14.9625	9.4625	19.59	24.6325	7.805	4.3325
	176	3	2	4.8025	3.69	1.17	0.8775	11.5	2.225	0.425	17.25	26.9625	15.9625	33.84	9.34	22.84	5.89	4.18
	177	3	2	5.065	5.09	1.375	1.3625	13.25	3.4125	0.58	20.75	50.2125	27.9625	13.2125	49.84	23.1425	9.645	7.295
	178	3	2	3.0725	5.365	2.5425	1.05	11	2.5725	0.6825	19	34.4625	15.34	12.2125	10.4625	20.295	12.035	8.6125
	179	4	2	4.78	4.3925	1.5025	0.85	8	2.49	0.5225	13	23.9625	9.9625	10.9625	21.4625	19.485	4.175	2.6625
	180	4	2	4.52	3.6725	1.3625	0.89	10	3.3425	0.5625	14.5	28.9625	14.7125	12.4625	20.9625	22.8625	7.6025	4.7125
	181	4	1	3.0025	4.93	1.29	1.0725	13	3.43	0.6525	16.5	44.9625	22.4625	17.9625	24.4625	46.0625	14.13	11.3025
	182	4	1	4.705	5.5625	1.7625	1.47	11.5	3.34	0.7625	14.5	64.9625	36.4625	16.9625	44.9625	44.8525	11.8125	8.85
	183	4	1	2.395	5.28	1.4625	1.48	13.5	2.36	0.7225	25	110.463	33.4625	19.9625	15.9625	60.525	21.1325	14.685
	184	4	2	4.0125	4.14	1.54	0.8825	9.625	2.8725	0.59	13.5	23.4625	14.4625	9.7125	20.4625	23.7325	8.4625	5.01
	185	4	1	4.72	4.7125	1.59	0.97	9.5	2.47	0.53	17.5	39.4625	17.9625	22.4625	21.4625	28.9125	13.81	8.62
	186	4	2	5.8125	3.9125	1.28	0.8425	8	3.03	0.54	13.5	15.9625	8.4625	8.4625	19.4625	12.7825	3.125	2.07
	187	4	2	4.95	4.25	1.5125	1.1125	11	2.9825	0.58	20	44.9625	21.9625	9.9625	21.4625	23.2	9.7425	6.59
	188	4	1	4.93	5.0125	1.74	1.28	9	4.05	0.69	20.5	72.9625	26.4625	12.9625	44.4625	37.4225	18.59	11.0125
	189	4	2	4.4625	6.59	2.0125	1.2025	10.5	2.5525	0.8725	15	73.7125	40.9625	20.4625	31.4625	44.5925	13.6325	9.32
	190	4	1	5.875	4	1.6625	0.83	6.5	1.72	0.4825	16	22.4625	8.4625	5.4625	10.4625	8.4025	2.56	1.515
	191	4	2	5.0425	3.4225	1.0925	0.8425	8	3.55	0.4325	14	11.9625	5.4625	3.9625	12.9625	9.61	4.485	2.9725
	192	4	2	3.165	5.6525	1.73	1.0625	8.5	2.78	0.72	20	67.9625	35.4625	12.4625	19.4625	45.155	22.4125	12.3425
	193	4	2	3.2125	3.9525	1.3125	0.8925	9.5	2.9625	0.5925	15	28.4625	12.9625	9.7125	11.9625	23.0225	7.9825	4.73
	194	4	2	4.4425	4.8725	1.5625	1.09	11	4.1125	0.6625	15.5	28.9625	16.4625	8.4625	19.2125	21.155	9.56	6.2825
	195	4	2	3.335	6.09	1.6125	1.3625	11.5	3.63	0.7025	20.5	91.9625	48.9625	18.4625	46.4625	72.1725	34.075	21.2025
	196	4	2	3.71	5.7125	1.44	1.53	12.5	3.79	0.75	23	70.4625	30.4625	16.9625	13.9625	34.8125	14.695	9.3125
	197	4	2	3.675	6.3425	1.9125	1.14	11	3.2625	0.6625	16.5	71.4625	29.9625	11.7125	27.9625	40.285	18.1625	11.0825
	198	4	2	3.13	5.05	1.6125	1.2125	9	4.0325	0.68	19	62.4625	27.9625	14.4625	16.7125	40.2525	17.98	9.8225
	199	4	2	3.24	6.5625	2.0825	1.2325	17	3.2225	0.68	18.5	79.4625	37.9625	26.9625	28.7125	61.8425	25.0425	17.795
	200	4	1	2.655	5.27	1.6125	1.3	12.5	3.3625	0.7	25.5	93.4625	38.4625	19.4625	15.9625	60.32	18.53	11.8725
	201	4	2	4.915	5.9925	2.0625	1.5625	9	3.3125	0.68	16	42.9625	20.4625	11.4625	43.4625	32.95	15.48	11.11
	202	4	2	2.7125	5.6125	1.5625	1.09	9	2.92	0.65	19	46.4625	30.2125	12.4625	19.9625	48.6725	21.295	13.045
	203	4	2	4.5725	4.6925	1.49	1.0125	9.5	3.8	0.6225	16	31.7125	15.9625	9.4625	27.2125	24.7025	7.48	5.12
	204	4	1	3.5075	5.4275	1.66	1.0175	10.75	3.6125	0.6375	17	46.6875	23.4575	12.2025	21.2175	34.7925	14.335	9.93
	205	4	1	3.0025	6.29	1.74	1.0725	9.5	3.1025	0.7	16	44.9625	21.9625	15.4625	17.9625	38.9125	17.155	10.14
	206	4	2	5.785	4.71	1.59	1.3625	7.5	1.9525	0.6025	20.5	54.9625	27.9625	9.9625	28.9625	24.96	10.35	8.86
	207	4	2	5.5025	3.32	1.2125	0.8525	8.5	4.1625	0.47	18.5	15.4625	7.7125	5.4625	19.9625	12.9925	4.275	2.705
	208	4	3	4.8925	7.0925	2.1125	1.33	10	3.26	0.7025	23	68.4625	30.9625	11.9625	25.9625	30.265	10.9425	9.1825
	209	4	2	5.135	4.9125	1.5625	1.2025	11	3.0625	0.7425	15.5	42.9625	22.4625	12.4625	33.9625	29.535	8.01	4.635
	210	4	2	4.3	5.22	1.7125	0.99	12	3.0725	0.75	17	40.4625	19.4625	14.9625	26.4625	30.745	12.2	6.5225
	211	4	2	2.7925	4.9925	1.2125	1.2525	12.5	3.5925	0.67	21	74.9625	37.4625	15.9625	13.9625	51.0325	14.7225	12.51
	212	4	3	5.1325	5.94	2.03	1.0225	8	3.73	0.65	20	42.9625	22.9625	12.4625	33.9625	29.2125	6.74	4.6025
	213	4	3	3.465	6.0125	1.9125	1.1425	13	3.3125	0.6825	20.5	55.9625	32.4625	19.4625	35.4625	53.885	21.3825	13.2325
	214	4	3	2.405	5.1725	1.45	1.2425	11.5	4.3225	0.7025	20.5	67.9625	20.4625	18.9625	14.9625	46.9725	15.4525	11.17
	215	5	3	3.745	6.83	1.8125	1.4725	11.5	4.02	0.91	20.5	123.463	56.4625	18.2125	43.2125	66.685	29.375	23.3725
	216	5	2	5.0225	6.3925	2.14	1.14	11	4.0625	0.78	17.5	55.9625	29.9625	12.9625	25.4625	29.4425	9.44	6.645
	217	5	2	3.7325	6.9125	2.0125	1.52	10.5	3.74	0.6225	18	72.9625	35.4625	14.9625	21.4625	40.935	15.0825	10.535
	218	5	1	3.6825	6.2625	2.0625	1.3125	12.5	3.54	0.6625	18.5	61.4625	28.4625	18.7125	33.4625	46.81	22.4925	16.2325
	219	5	2	3.9525	5.9625	1.8625	0.99	10	3.35	0.5925	19	33.9625	23.4625	11.9625	30.9625	34.775	7.8425	4.2825
	220	5	3	3.1425	5.8625	1.8125	1.0625	9.5	3.5125	0.79	18	56.4625	31.4625	13.7125	17.4625	46.0325	19.6425	11.35
	221	5	1	3.545	5	1.8125	0.83	7.5	3.1825	0.64	17.5	43.4625	21.4625	12.7125	24.7125	35.2725	18.845	14.3125
	222	5	3	5.115	5.3625	1.74	1.1125	8	2.7	0.57	19	49.9625	22.9625	13.4625	31.9625	28.9025	14.3025	11.3925
	223	5	1	5.275	4.54	1.375	0.9775	6.25	4.1	0.555	15.25	33.4275	15.1775	9.9275	27.9275	20.27	10.42	7.3775
	224	5	3	3.0925	6.8625	2.1125	1.2025	9.5	3.2925	0.75	17	74.9625	47.9625	23.9625	32.4625	72.8225	28.55	18.09
	225	5	2	4.335	5.33	1.79	0.9625	10.5	4.1	0.71	19	47.4625	19.9625	14.9625	21.9625	28.26	12.745	9.6425
	226	5	3	2.8625	6.1525	1.69	1.5525	14.5	3.4025	0.7125	21.5	73.4625	37.4625	17.4625	21.4625	57.905	25.525	18.1425
	227	5	3	4.8525	5.41	1.8625	1.0325	8	4.0625	0.61	17.5	44.9625	26.4625	11.9625	23.4625	27.3525	11.7425	5.84
	228	5	3	3.7225	7.2625	2.1125	1.2125	11.75	2.99	0.73	22	143.963	63.9625	20.4625	44.4625	74.625	38.4525	25.14
	229	5	2	4.2725	3.6825	1.6525	0.9425	8	3.09	0.64	14	34.4625	17.4625	13.7125	30.9625	31.2425	6.7625	2.815
	230	5	2	3.7825	5.45	1.59	0.93	8	3.7125	0.7	17	37.4625	17.9625	13.2125	13.7125	26.93	5.8225	4.0125
	231	5	1	4	5.63	1.79	1.29	11	3.6025	0.73	15.5	45.9625	22.9625	19.4625	28.9625	38.405	16.0825	12.365
	232	5	1	3.785	5.97	1.9625	0.9225	10	4.44	0.5325	19	51.9625	17.9625	11.4625	23.4625	30.34	16.0025	9.0425
	233	5	3	3.305	6.4125	1.6125	1.33	10	3.79	0.7625	16.5	87.4625	44.4625	20.9625	33.9625	65.0225	26.63	19.1425
	234	5	1	2.505	5.8125	1.4125	1.3425	14	3.5025	0.7525	26	102.963	43.9625	27.4625	22.4625	78.1625	31.6	20.335
	235	5	1	2.8625	5.58	1.6125	1.13	9.5	2.4125	0.6325	17	49.4625	18.9625	12.4625	17.9625	37.455	18.5225	12.84
	236	5	3	5.1625	4.2425	1.44	0.9825	9.5	3.1125	0.6	17	31.9625	15.9625	7.9625	24.9625	20.4525	7.2225	4.935
	237	5	2	2.8525	5.27	1.6125	0.8025	8	3.8625	0.6925	17.5	32.9625	21.4625	8.9625	12.4625	31.735	12.135	6.9625
	238	5	2	3.775	6.6625	2.1125	1.1125	11.5	3.5525	0.64	21.5	76.9625	30.9625	11.9625	27.9625	41.1	18.785	13.565
	239	5	2	2.34	5.3625	1.29	0.9025	11.5	3.5125	0.8	22.5	60.9625	21.4625	20.4625	7.4625	46.12	11.8525	6.955
	240	5	2	2.675	6.0625	1.7625	1.05	9	3.4325	0.84	17.5	61.4625	27.9625	17.9625	14.9625	49.625	17.865	13.3925
	241	5	3	4.6	6.0925	2.1625	1.1725	11.5	3.24	0.7725	16	60.9625	31.7125	14.9625	30.4625	36.2825	14.56	8.685
	242	5	3	2.3225	5.28	1.4125	0.97	11.5	4.5125	0.7625	18	47.9625	23.9625	15.9625	9.7125	47.0725	13.6925	8.9525
	243	5	2	2.705	6.74	1.9625	1.4125	11.5	3.6	0.9425	22	124.963	54.2125	25.9625	26.9625	82.8425	25.53	14.67
	244	5	2	2.4525	5.63	1.49	0.95	12.5	3.29	0.74	21	54.9625	16.4625	12.9625	7.9625	33.1725	11.0325	6.1625
	245	5	2	4.995	5.49	1.9025	0.87	6.5	2.94	0.6725	13	33.4625	15.4625	9.9625	21.9625	20.4825	9.0725	6.9025
	246	5	2	3.4325	5.44	1.9125	0.8425	9	2.94	0.57	18	39.9625	17.4625	7.9625	11.9625	23.6025	10.8425	6.02
	247	5	3	3.7225	5.24	1.59	0.89	8.5	3.1025	0.5125	16	30.4625	15.7125	10.4625	16.7125	24.5225	11.3925	7.4025
	248	5	2	5.12	5.5525	1.7125	0.95	9.5	3.9725	0.6725	13.5	42.4625	19.4625	11.9625	24.4625	26.535	9.735	7.4525
	249	5	1	4.925	6.6725	2.1125	1.4125	12	3.4725	0.73	25	96.9625	41.4625	19.9625	41.4625	44.8825	16.7725	12.19
	250	5	3	2.8625	6.25	2.0125	1.0125	9.5	3.22	0.6725	16.5	55.4625	28.9625	12.9625	12.4625	41.28	19.2925	12.85
	251	5	1	3.41	5.25	1.6125	0.8025	9	4.01	0.48	17	25.2125	12.7125	9.4625	10.7125	20.92	10.1225	6.4425
	252	5	2	4.2125	6.1625	1.8125	1.59	12.5	3.33	0.74	20	79.9625	43.2125	29.9625	87.9625	81.7625	42.3025	22.545
	253	5	3	4.7825	5.32	1.94	1.0325	9	3.8425	0.6025	16.5	47.9625	24.4625	9.9625	20.9625	24.8925	6.9125	3.655
	254	5	2	5.775	6.0725	1.6325	1.33	9.5	3.55	0.64	17.5	81.9625	42.4625	15.4625	53.4625	42.045	9.0125	7.14
	255	5	2	3.7825	5.8625	1.9625	1.04	10.5	2.76	0.74	21	47.9625	25.4625	12.4625	25.2125	35.6325	15.375	9.72
	256	6	1	3.6225	4.6	1.6125	1.0125	10.5	2.69	0.5325	19	40.9625	23.4625	11.9625	20.4625	32.87	15.3825	7.1025
	257	6	2	3.035	5.7125	1.63	1.5025	10.5	2.8425	0.6875	22.5	96.4625	59.4625	16.9625	24.4625	70.0625	33.9425	24.55
	258	6	4	3.1425	4.9625	1.5625	0.9325	8	3.4125	0.6225	17	33.2125	22.9625	14.9625	18.4625	37.9525	13.995	8.3425
	259	6	2	5.02	5.2625	1.3625	1.0125	8.5	3.96	0.59	15.5	64.4625	32.9625	12.9625	18.4625	28.075	17.9425	10.3025
	260	6	4	3.1325	6.54	2.0125	1.3225	12.5	2.5625	0.78	25.5	84.4625	48.4625	20.9625	29.2125	66.68	30.95	21.8025
	261	6	4	4.84	4.6925	1.33	1.0125	8.5	3.1625	0.61	12.5	34.9625	17.9625	10.9625	26.9625	24.7625	9.4825	6.1625
	262	6	1	3.7925	4.5825	1.29	1.2625	9.5	3.79	0.64	19	49.4625	49.4625	28.4625	9.4625	61.575	19.7725	15.4825
	263	6	2	5.12	5.8125	1.89	1.2125	10	3.5925	0.42	18.5	87.9625	41.4625	13.4625	25.2125	33.6125	12.175	9.865
	264	6	1	5.25	6.19	1.49	1.54	10.5	3.19	0.7125	19.5	103.963	60.9625	19.9625	74.4625	64.335	20.6725	15.805
	265	6	2	3.415	5.5625	1.4625	1.09	8	3.99	0.6	16.5	45.9625	25.9625	11.9625	17.9625	35.3225	13.535	9.06
	266	6	2	4.235	6.39	1.94	1.19	9.5	3.48	0.6525	17.5	87.4625	40.9625	24.9625	45.9625	57.2	18.215	12.7425
	267	6	1	3.6725	5.7625	1.7625	1.19	10.5	2.64	0.6	18.5	49.4625	25.9625	15.9625	26.9625	40.28	19.3125	12.34
	268	6	4	2.86	4.3525	1.24	1.01	9	3.49	0.5725	18	35.4625	21.9625	10.9625	10.2125	31.75	9.2575	7.6875
	269	6	4	3.0825	5.24	1.4625	1.0825	10.5	3.3025	0.6	16.5	44.9625	29.7125	14.4625	16.2125	42.3425	18.0025	12.045
	270	6	1	5.725	5.4825	1.84	1.28	9.5	3.23	0.63	17	44.4625	17.4625	13.9625	45.9625	25.9825	7.275	5.3925
	271	6	1	4.84	5.1525	1.64	1.13	9	3.74	0.65	15	46.4625	25.4625	14.9625	37.4625	34.585	15.935	13.05
	272	6	1	3.575	6.24	2.0625	1.1125	11.5	3.0625	0.64	48.5	67.4625	34.4625	18.4625	31.4625	50.3425	24.2125	15.495
	273	6	2	4.3725	4.8725	1.64	1.1625	9.5	2.7825	0.6125	17	58.7125	28.9625	11.9625	29.4625	34.5	13.4725	8.77
	274	6	4	4.76	4.5025	1.49	0.8625	8	3.53	0.6225	18.5	34.4625	16.4625	7.4625	13.9625	17.225	6.965	4.25
	275	6	4	3.1825	5.6625	1.69	1.0525	9	3.64	0.69	15	40.4625	27.9625	14.4625	17.9625	41.065	17.6325	11.5125
	276	6	4	2.7625	5.75	1.6125	1.14	11.5	3.34	0.6125	24	70.4625	39.9625	14.9625	21.4625	58.4	23.1025	15.5225
	277	6	4	3.165	5.4125	1.64	1.0825	11.5	2.4325	0.65	21.5	52.9625	29.4625	20.9625	11.9625	41.8225	19.3125	12.955
	278	6	4	3.1425	4.04	1.1625	0.94	8	3.73	0.5325	19.5	39.9625	25.4625	12.7125	11.9625	34.9025	15.2625	10.9125
	279	6	2	4.105	6.04	1.6125	1.2625	12.5	3.14	0.6825	21.5	81.9625	43.4625	16.4625	23.4625	43.68	21.03	16.9425
	280	6	2	3.3825	5.0125	1.44	0.9625	11.5	2.6525	0.54	18.5	32.9625	17.4625	11.4625	15.9625	28.11	15.31	8.725
	281	6	2	4.3925	3.0125	1	1.1825	9.5	3.4325	0.4775	21	81.4625	32.4625	20.2125	25.9625	38.375	14.3325	11.0325
	282	6	2	4.505	5.66	1.8	1.04	9	3.7325	0.7	15.5	41.9625	18.9625	11.4625	32.9625	30.1525	9.71	7.4525
	283	6	2	3.4425	6.04	1.5625	1.44	12	4.24	0.6025	23	85.4625	52.9625	27.4625	36.9625	73.1725	28.5925	19.375
	284	6	2	3.47	5.89	1.8125	1.3525	12.5	2.89	0.6425	23	86.4625	55.7125	23.2125	34.9625	70.0525	32.2	20.2325
	285	6	2	4.5325	4.6525	1.6625	1.09	10	3.3925	0.6525	18.5	43.4625	21.4625	15.4625	26.4625	30.7	9.4025	6.4925
	286	6	4	3.2825	5.825	1.7625	1.0925	9.75	4.005	0.555	21	45.4625	14.34	14.84	14.59	45.7125	9.855	7.895
	287	6	4	3.795	6.515	2.09	1.3925	12.75	3.9725	0.6925	22.5	79.2125	14.9625	14.34	23.7125	63.7125	12.1325	10.5125
	288	6	4	3.2325	6.48	1.875	1.305	12	3.6425	0.6725	25	75.2125	15.2125	15.84	25.84	44.9625	10.3725	8.9925
	289	6	4	3.325	5.875	1.89	1.215	9	4.005	0.5925	15.25	44.59	12.2125	13.7125	16.2125	58.4625	13.0025	11.7325
	290	6	1	2.7125	6.765	1.94	1.575	12.75	3.365	0.6225	27.5	94.9625	17.34	19.295	24.7125	96.9625	26.4625	20.075
	291	6	2	4.425	5.625	1.7125	1.44	11.25	3.015	0.6725	24	133.713	14.09	15.2125	22.7125	68.2125	10.665	5.9425
	292	6	3	3.085	5.4625	1.8625	1.315	10.25	2.6425	0.605	20.75	58.7125	10.7125	11.4625	15.09	38.59	9.07	5.635
	293	7	3	4.2325	4.79	1.3425	1.1925	8.25	3.9325	0.56	16	46.5525	22.9625	10.48	12.845	11.6525	8.4725	5.38
	294	7	3	5.995	5.0725	1.8325	1.405	11.25	3.83	0.6525	21.5	105.953	47.04	16.9525	26.09	28.4625	17.63	12.27
	295	7	3	5.9125	4.255	2	1.115	8.25	3.9125	0.6475	18.75	73.14	30.8625	17.7625	19.9625	17.625	12.5	8.7325
	296	7	3	5.8425	4.225	2.345	1.045	10	3.44	0.69	15.75	52.3625	26.7125	19.99	18.1125	18.74	14.0625	9.82
	297	7	3	5.1425	4.85	1.515	1.2325	13.25	2.8825	0.66	22.75	56.9125	33.4625	15.3525	21.13	23.09	14.2125	10.42
	298	7	3	4.645	5.945	1.355	1.285	12	2.75	0.64	21	58.39	25.34	11.34	17.9625	18.4025	9.7725	6.8525
	299	7	3	4.505	5.16	1.32	1.2125	10	3.6225	0.6075	20.25	71.4525	31.9625	13.9125	22.8125	22.5525	12.9025	9.06
	300	7	3	5.6525	6.125	1.1075	1.0925	10.25	3.6025	0.66	21	74.6525	44.1525	20.775	19.7125	26.9625	13.015	9.73
	301	7	3	6.3675	7.02	1.8525	1.8625	12	3.7725	0.57	25.75	151.88	71.545	36.13	57.545	43.295	14.1475	12.8
	302	7	3	5.7525	6.635	1.7025	1.3125	13	3.545	0.655	24	100.713	47.7525	26.7525	30.095	23.4625	10.685	7.95
	303	7	3	5.775	5.0525	1.9225	1.2625	12	3.0825	0.69	18.75	52.8125	31.99	26.89	24.14	21.84	12.385	9.3825
	304	7	3	4.9025	5.105	1.505	1.4125	9.25	3.115	0.695	18.25	66.34	35.59	13.7625	25.94	17.4625	10.225	7.61
	305	7	3	4.965	4.955	1.515	1.1825	13	2.86	0.6475	21	57.79	30.625	12.79	21.6625	15.69	10.3925	6.8425
	306	7	3	4.725	7.2225	1.4525	1.2	11	3.935	0.63	23.25	56.9625	30.2125	18.4625	28.7125	29.2125	11.215	8.9125
	307	7	3	5.905	5.075	1.73	1.3525	9.75	4.335	0.6025	19.75	58.4625	33.2125	18.3625	21.38	19.13	10.965	8.1125
	308	7	3	5.9325	7.7125	2.12	1.69	13	3.6325	0.815	26	121.963	63.7125	18.2125	50.7125	54.4625	17.97	15.5925
	309	7	3	5.7325	6.3625	1.62	1.425	12.75	3.9	0.7	24.25	88.2125	43.8025	19.5125	35.09	29.675	13.005	10.3025
	310	7	3	6.0025	7.155	2.24	1.6725	10	3.4225	0.7925	20.5	122.463	66.7125	39.7125	65.2125	52.9625	20.3525	16.3425
	311	7	3	5.37	4.9	1.795	1.3025	11.5	3.8225	0.7125	24.25	61.59	34.09	14.7625	24.0025	20.0025	12.6925	8.8625
	312	7	3	5.7725	5.0525	1.725	1.3625	10.5	3.4525	0.7	21.5	80.5625	40.8125	15.34	38.09	24.74	13.65	10.7825
	313	7	3	5.4975	5.095	1.89	1.3625	10.5	3.2325	0.68	19	79.525	44.84	25.19	43.34	32.2125	17.2225	13.99
	314	7	3	5.3925	4.35	2.4625	1.18	10.25	3.135	0.66	16.25	37.59	20.73	22.5025	36.7525	12.795	9.7325	6.4125
	315	7	3	5.1025	4.6625	1.52	1.23	10.75	3.515	0.6325	19.25	60.74	26.09	17.7125	28.84	22.84	14.1925	10.7025
	316	7	3	5.665	5.285	1.7	1.485	11.25	3.23	0.74	23	121.775	49.84	21.7125	50.2125	21.34	12.6525	8.9525
	317	7	3	5.255	5.5325	1.855	0.96	12.25	3.7925	0.715	20	54.2125	26.34	18.475	26.775	16.4625	9.1925	6.68
	318	7	3	6.0025	4.665	1.94	1.4325	11.75	3.79	0.7475	27.75	69.75	52.4625	19.9625	39.13	21.83	13.6825	11.2025
	319	7	3	6.005	4.545	2.065	1.405	10.5	3.3325	0.62	25	89.55	34.13	26.095	32.2925	20.7625	12.905	9.8125
	320	7	3	4.9125	5.13	1.375	1.28	11.25	2.915	0.6375	20.25	66.495	33.595	18.1125	22.545	17.2125	9.935	7.4725
	321	7	3	4.8325	6.7425	1.24	1.51	10	3.26	0.585	25	79.2125	32.4625	19.7125	35.7125	16.2125	7.085	5.5025
	322	7	3	4.47	5.7025	1.45	1.1825	9.25	2.945	0.57	20	48.6125	23.4625	17.2625	29.2125	16.2125	8.7125	6.5425
	323	7	3	5.85	5.225	2.2525	1.405	10.25	3.81	0.6425	21.25	100.812	53.795	19.63	42.0025	29.63	16.64	12.61
	324	7	3	5.0225	4.515	1.62	1.1	10.25	3.145	0.6525	19	59.2025	28.79	16.225	27.09	19.89	12.8925	9.8325
	325	7	3	4.3025	6.5325	1.44	1.2725	9.5	2.57	0.5725	19	31.9625	19.2125	15.0625	18.9625	30.9625	13.035	10.8
	326	7	3	5.655	4.555	2.1025	0.94	7	3.035	0.64	12	27.7125	16.2125	17.1125	14.8625	18.4625	12.95	9.4725
	327	7	3	5.965	4.2	1.9225	1.3225	9	3.7725	0.625	21	93.53	39.23	17.7925	27.795	17.13	12.3125	9.29
	328	7	3	5.9875	4.15	2.19	1.065	8.5	3.5825	0.66	19	99.295	40.7625	19.63	31.93	20.4625	13.695	11.81
	329	7	3	4.6025	4.9125	1.4625	1.215	9.5	4.6825	0.6425	17	42.5625	23.5025	13.2025	19.39	13.59	8.71	6.17
	330	7	3	3.62	5.375	1.1625	1	8.5	2.4325	0.61	14.75	31.7125	19.9625	8.7625	15.34	11.7125	7.0425	4.78
	331	7	3	5.15	5.945	1.7325	0.8925	9.25	3.145	0.705	16	29.095	19.295	14.63	24.9625	19.6325	9.6425	7.3525
	332	7	3	4.6825	5.8025	1.575	1.105	10	2.9725	0.6425	17.25	61.63	33.13	17.045	36.9625	23.9625	13.2625	9.965
	333	8	2	5.8825	4.425	1.7625	1.4825	10.5	3.5825	0.69	19.25	92.94	40.64	23.2625	27.1525	23.8025	16.995	11.585
	334	8	2	5.3025	4.485	1.5625	1.275	9.75	3.295	0.7025	18	67.04	32.49	21.7125	30.9625	25.7625	17.7025	12.85
	335	8	2	4.8525	5.015	1.545	1.0825	8.5	3.09	0.7125	19	54.68	29.995	14.38	29.23	22.7125	14.1	10.06
	336	8	2	5.8775	3.9825	2.415	1.3	14.25	4.6225	0.725	22	89.3625	42.9625	27.4625	32.14	28.6625	21.91	16.285
	337	8	3	5.915	5.3025	2.0825	1.565	11	3.76	0.7725	25.5	83.0025	48.34	18.745	39.9025	32.34	18.2	13.395
	338	8	4	5.4925	3.955	1.6025	1.5325	11	3.345	0.7	23.25	80.595	38.58	23.085	38.3125	19.94	15.21	11.2525
	339	8	4	5.85	4.565	1.7325	1.5125	11.25	3.96	0.72	19.75	81.6125	40.9225	23.165	33.365	22.5625	15.2625	11.0525
	340	8	4	5.6	4.09	1.79	1.2025	11	3.6825	0.69	17.25	54.49	27.49	18.64	32.54	24.69	18.045	13.7325
	341	8	4	4.575	5.265	1.44	0.8425	8.25	2.9725	0.5725	19.25	37.2125	21.4625	8.7125	27.7125	21.09	12.3425	8.7725
	342	8	4	4.815	4.71	1.64	1.0925	8.5	2.995	0.59	12.5	33.2125	17.9625	13.4625	41.7125	16.7125	10.65	7.9025
	343	8	4	5.9	4.1125	1.975	1.095	10	3.9325	0.6875	18	44.73	23.9025	17.9025	26.595	23.59	16.4925	13.1625
	344	8	3	5.145	4.6825	1.4225	1.275	10.25	3.2	0.6325	17	44.5725	24.0525	19.395	47.4125	23.9025	15.4725	11.085
	345	8	3	5.76	4.3425	1.8525	1.195	12.75	3.675	0.6625	22.25	68.5625	36.8125	19.875	27.8125	28.3625	18.485	14.33
	346	8	3	5.925	3.745	2.3425	1.3725	13	4.6925	0.8	25	101.54	44.54	23.49	31.09	32.6625	27.185	19.5725
	347	8	3	5.9875	3.53	1.8425	1.0225	15.75	3.935	0.705	24.75	81.04	33.74	13.7125	22.94	22.1125	18.975	13.9025
	348	8	3	5.9875	4.065	2.37	1.495	13	4.2	0.7975	22	94.5625	39.29	27.6625	44.9625	30.4625	24.39	16.9625
	349	8	3	3.055	5.1825	0.8925	1.1425	10.5	2.005	0.52	17.25	22.5125	13.7125	21.2125	22.7125	20.9625	12.4225	8.91
	350	8	3	5.825	4.0625	2.2625	1.3625	11.5	3.835	0.71	23	106.713	50.0625	31.2025	40.025	35.2625	23.835	19.7825
	351	8	3	5.3625	4.3825	1.455	1.3425	12.5	3.085	0.64	18.75	57.39	28.5125	17.44	25.34	21.9025	15.09	11.09
	352	8	3	5.825	4.0725	1.7225	1.395	15.5	4.3525	0.6975	23.75	116.113	49.0625	19.69	27.99	17.4625	13.59	9.6225
	353	8	3	5.9	4.315	2.175	1.275	12	4.075	0.67	24.25	75.49	39.7625	19.84	23.54	24.0625	16.5125	12.39
	354	8	3	5.85	4.0325	2.525	1.2925	13.5	4.4725	0.6875	23	95.2125	47.2125	24.0625	39.6625	27.64	20.49	15.155
	355	8	3	5.85	3.9025	2.505	1.105	12.25	3.75	0.6425	18.75	71.39	28.94	17.0625	16.14	23.3125	17.7225	13.405
	356	8	3	5.6725	5.0625	1.9725	1.435	11	3.605	0.6375	19	68.7525	37.84	22.44	43.99	24.1625	15.63	10.5825
	357	8	3	5.4025	4.42	1.7525	1.185	10.25	3.3225	0.6125	18.5	51.29	25.0625	13.99	24.7125	20.59	14.05	10.8325
	358	8	3	5.875	4.315	2.0425	1.305	15	3.6	0.6425	23.25	85.7525	38.645	23.8125	31.84	25.545	17.3825	13.3325
	359	8	3	5.925	4.235	2.2825	1.3125	12.5	3.33	0.6425	24.5	106.213	41.7125	26.7625	28.59	26.09	17.6525	13.9325
	360	8	4	5.925	4.2125	2.5325	1.4525	12	4.095	0.7325	25	88.2625	41.79	23.6125	25.8025	28.9025	20.32	14.9525
	361	8	4	5.9	5.09	3.1725	1.525	10.5	4.5725	0.7675	22.25	85.6625	47.54	32.2125	67.9625	29.09	17.1325	13.0525
	362	8	3	4.9125	5.0925	1.5725	1.32	9	3.19	0.625	16	44.4625	26.9625	21.9625	40.4625	21.9625	12	9.4225
	363	8	3	5.925	3.5125	1.945	0.8725	16.25	3.845	0.5975	22	58.74	26.9125	17.99	20.99	27.94	19.505	16.79
	364	8	3	5.765	5.125	1.78	1.4125	9	3.72	0.7	17.75	56.295	30.295	16.68	43.13	40.9225	20.99	17.74
	365	9	2	3.9625	2.135	1.27	1.155	14	2.7325	0.695	17	34.19	18.0025	9.14	13.4725	11.2125	18.34	11.4825
	366	9	2	5.1725	4.2725	1.7425	1.0225	9	3.535	0.71	17.25	42.84	26.63	17.7525	22.63	19.1725	12.515	10.04
	367	9	2	5.95	4.2725	2.3325	1.7025	12	4.195	0.83	22	131.963	52.5825	44.4625	67.2925	35.63	22.45	18.6825
	368	9	2	5.86	3.825	1.9025	1.3825	10	3.65	0.775	19.25	116.963	46.7925	37.13	57.4625	47.13	22.94	17.8375
	369	9	2	5.26	2.285	1.79	1.04	9	3.3025	0.6725	16.25	43.2125	27.59	15.89	18.3125	14.9625	19.585	14.7925
	370	9	2	5.2325	3.3525	1.5125	1.1525	12.25	3.055	0.6025	21	52.9625	30.13	16.39	23.48	23.125	19.355	15.5225
	371	9	2	5.975	4.855	1.9625	1.81	12	3.8025	0.8375	19	114.38	64.795	32.13	57.545	23.13	13.96	10.5525
	372	9	2	5.165	3.4325	1.6125	1.3125	12	3.205	0.7025	17	48.44	30.4625	12.84	24.2025	26.025	24.9425	17.635
	373	9	2	5.645	5.0125	2.0125	1.41	10.25	3.2925	0.72	19.25	71.38	50.045	16.63	36.545	32.38	17.37	14.3925
	374	9	2	5.945	4.79	1.675	1.57	12.25	3.44	0.705	20.5	74.4625	35.9625	14.2125	41.4625	34.4625	19.545	15.93
	375	9	2	4.3325	2.8	1.28	1.265	11.75	2.725	0.67	20.25	34.5925	20.84	13.54	20.84	19.0525	20.0525	14.775
	376	9	2	5.335	3.8925	1.615	1.105	9	3.645	0.67	15.75	35.9625	23.4625	16.9625	16.9625	24.7125	17.625	13.9525
	377	9	2	4.4025	3.7625	1.44	1.525	9	2.6625	0.66	17.5	36.4625	24.9625	14.9625	22.9625	15.9625	12.76	9.2425
	378	9	1	5.245	4.69	1.5125	1.2525	9.25	3.29	0.66	19.25	72.4625	32.9625	22.2125	40.4625	25.9625	15.0225	12.2025
	379	9	1	5.505	2.9525	1.715	1.34	13	3.11	0.7325	20.75	67.0925	38.7125	21.5025	22.4525	26.49	27.15	20.15
	380	9	1	5.145	2.835	1.67	1.105	10.25	3.13	0.6225	17	50.4525	26.34	11.14	19.865	24.1525	26.0625	18.8825
	381	9	1	5.2625	3.285	1.675	1.06	8	3.3425	0.7825	19.25	47.6525	23.7125	12.7025	20.6525	17.825	17.2325	12.1825
	382	9	1	4.0525	4.0025	1.3525	1.03	10.75	2.875	0.48	20.75	34.1325	22.6325	10.13	23.2925	29.13	20.365	16.1525
	383	9	1	5.0825	3.9025	1.4625	0.9625	17	3.2025	0.3325	20.5	30.4625	20.4625	10.4625	18.9625	19.9625	15.7425	11.2325
	384	9	1	4.0525	3.985	1.325	0.8625	9	2.4625	0.5525	16.25	20.485	12.34	7.5525	14.1625	16.63	12.42	9.21
	385	9	1	4.59	4.21	1.59	0.7025	7.5	2.7325	0.7725	16.125	22.9625	16.7125	12.4625	17.7125	21.7125	14.555	11.555
	386	9	1	4.6225	4.3125	1.7025	0.58	11.75	2.2525	0.5675	22	37.84	22.4625	17.2125	21.59	21.2125	13.995	10.98
	387	9	1	3.705	3.96	1.135	0.76	7.5875	2.1725	0.5525	22.25	23.63	14.795	9.795	19.545	17.7125	12.435	9.9
